# Supplementary material for: Praxisanleitung: Qualifikation akademisieren
Source: Springer Nature journal article supplement (doi:10.1007/s43877-023-0846-6), 2024-01-01
Supplement: MOESM1 [file 26612490]

## Literatur

### zum Beitrag „Praxisanleitung: Qualifikation akademisieren“

von Marie-Jeannine Riefert, Harald Abele, Joachim Graf

HebammenWissen (5) 1/2024, S. 24-27

Agel L. (2020) Praxisanleitung – ein Instrument für einen gelungenen Theorie-Praxis-Transfer. Die Hebamme 33(6):18–23

Bundesministerium für Bildung und Forschung, Kultusministerkonferenz (o. J.). DQR-Niveaus. [https://www.dqr.de/dqr/de/der-dqr/dqr-niveaus/dqr-niveaus\\_node.html](https://www.dqr.de/dqr/de/der-dqr/dqr-niveaus/dqr-niveaus_node.html) (letzter Zugriff am 1.12.2023)

Bovermann Y. (2021) Praxisanleitung bei klinischen und außerklinischen Einsätzen: Qualifizierung zur Praxisanleitung und Kooperationen mit Kliniken. Deutscher Hebammenverband.

[https://hebammenverband.de/wp-content/uploads/2023/05/21-7\\_DHV\\_Qualifizierung\\_zur\\_Praxisanleitung.pdf](https://hebammenverband.de/wp-content/uploads/2023/05/21-7_DHV_Qualifizierung_zur_Praxisanleitung.pdf) (letzter Zugriff am 1.12.2023)

Denzel S. (2019) Praxisanleiter – pflegen, ausbilden, begleiten. 4. überarbeitete Auflage. Stuttgart: Thieme

Deutsche Krankenhausgesellschaft e. V. (2023) DKG-Empfehlung für die Weiterbildung zur Praxisanleitung vom 03.07/04.07.2023.

[https://www.dkgev.de/fileadmin/default/Mediapool/2\\_Themen/2.5\\_Personal\\_und\\_Weiterbildung/2.5.11\\_Aus-und\\_Weiterbildung\\_von\\_Pflegeberufen/Praxisanleitung/Downloads\\_ab\\_04.07.23/DKG-Empfehlung\\_Praxisanleitung\\_2023\\_06\\_01.pdf](https://www.dkgev.de/fileadmin/default/Mediapool/2_Themen/2.5_Personal_und_Weiterbildung/2.5.11_Aus-und_Weiterbildung_von_Pflegeberufen/Praxisanleitung/Downloads_ab_04.07.23/DKG-Empfehlung_Praxisanleitung_2023_06_01.pdf) (letzter Zugriff am 1.12.2023)

Flaiz B, Winkelmann C, Simon A. (2016) Entwicklung eines Kompetenzprofils?! PADU-A 11(4):275–279

Frank JR. (Hrsg.) (2005) The CanMEDS 2005 Physician Competency Framework: Better standards. Better physicians. Better care. Ottawa: The Royal College of Physicians and Surgeons of Canada

Graf J, Simoes E, Blaschke S, Plappert CF, Hill J, Riefert M, Abele H. (2020) Academisation of the Midwifery Profession and the Implementation of Higher Education in the Context of the New Requirements for Licensure. Geburtshilfe Frauenheilkd 80(10):1008-1015

Mahler C, Karstens S, Roos M, Szecsenyi J. (2012) Interprofessionelle Ausbildung für eine patientenzentrierte Versorgung der Zukunft. Die Entwicklung eines Kompetenzprofils für den Bachelor-Studiengang „Interprofessionelle Gesundheitsversorgung“. Zeitschrift für Evidenz, Fortbildung und Qualität im Gesundheitswesen 106(7):523–532

Mamerow R. (2010) Praxisanleitung in der Pflege. Berlin, Heidelberg: Springer

Schmal J. (2017) Unterrichten und Präsentieren in Gesundheitsfachberufen: Methodik und Didaktik für Praktiker. Berlin, Heidelberg: Springer

Schönhardt S, Plappert CF, Graf J, Abele H (2020) Neuordnung der Hebammenausbildung. Frauenheilkunde up2date 14(3):211-223

Them C, Auböck U, Haselwanter-Schneider A (2014) Die Rolle von Praxisanleitern und Praxisanleiterinnen in der klinisch-praktischen Ausbildung von österreichischen Pflegestudierenden: Ergebnisse einer Expertenbefragung. Pflege & Gesellschaft 3:251
