# Supplementary material for: Praxisanleitung: Qualifikation akademisieren
Source: Springer Nature journal article supplement (doi:10.1007/s43877-023-0846-6), 2024-01-01
Supplement: MOESM2 [file 26612490]

## Tabelle 1

### zum Beitrag „Praxisanleitung: Qualifikation akademisieren“

von Marie-Jeannine Riefert, Harald Abele, Joachim Graf

HebammenWissen (5) 1/2024, S. 24-27

Tabelle 1: Gegenüberstellung der Modulinhalte der Deutschen Krankenhausgesellschaft und der Module des Masterstudiengangs Hebammenwissenschaft und Frauengesundheit Tübingen

| Grundlagen der Praxisanleitung anwenden                     |                                                 |     |                                   |                                                                                                                                 |     |
|-------------------------------------------------------------|-------------------------------------------------|-----|-----------------------------------|---------------------------------------------------------------------------------------------------------------------------------|-----|
| Module Praxisanleitung DKG                                  |                                                 |     | Module Masterstudiengang Tübingen |                                                                                                                                 |     |
| Modul                                                       | Titel                                           | Std | Modul                             | Titel                                                                                                                           | Std |
| PA M I ME 1                                                 | Lernen                                          | 32  | H2a                               | Pädagogische Psychologie und Hochschuldidaktik                                                                                  | 31  |
| PA M I ME 2                                                 | Theoriegeleitet pflegen                         | 24  | F1                                | Wissenschaftskommunikation<br>Wissenschaftstheorien, -methoden                                                                  | 41  |
| PA M I ME 3                                                 | Anleitungsprozesse planen und gestalten         | 32  | H2a                               | Die Hebamme als Lehrende und Wissensvermittlerin komplexer Zusammenhänge                                                        | 21  |
| PA M I ME 4                                                 | Qualitätsmanagement – prozesshaft gestalten     | 12  | M3                                | Qualitäts- und Risikomanagement, Safetyinitiativen, Medizinhaftpflicht/ Rechtsmedizin, Personalführung, Business Administration | 42  |
| Im Tätigkeitsfeld der Praxisanleitung professionell handeln |                                                 |     |                                   |                                                                                                                                 |     |
| Module Praxisanleitung DKG                                  |                                                 |     | Module Masterstudiengang Tübingen |                                                                                                                                 |     |
| Modul                                                       | Titel                                           | Std | Modul                             | Titel                                                                                                                           | Std |
| PA M II ME 1                                                | Die Rolle als Praxisanleiter bewusst wahrnehmen | 16  | M2                                | Management & Führung: Persönlichkeitsentwicklung                                                                                | 21  |
| PA M II ME 2                                                | Anleiten                                        | 60  | H2b                               | Vertiefte Hebammenkompetenz: Angewandtes Lehren und Lernen im Praxisumfeld von Hebammen - Pädagogisches Seminar                 | 48  |
| PA M II ME 3                                                | Beurteilen und bewerten                         | 24  | H2b                               | Vertiefte Hebammenkompetenz: Angewandtes Lehren und Lernen im Praxisumfeld von Hebammen - Rechtliche Grundlagen                 | 24  |
| Persönliche Weiterentwicklung fördern                       |                                                 |     |                                   |                                                                                                                                 |     |
| Module Praxisanleitung DKG                                  |                                                 |     | Module Masterstudiengang Tübingen |                                                                                                                                 |     |
| Modul                                                       | Titel                                           | Std | Modul                             | Titel                                                                                                                           | Std |

|                  |                                                             |    |     |                                                                                                                                               |    |
|------------------|-------------------------------------------------------------|----|-----|-----------------------------------------------------------------------------------------------------------------------------------------------|----|
| PA M III ME<br>1 | In der Rolle als<br>Praxisanleiter<br>Beziehungen gestalten | 40 | M2  | Persönlichkeitsentwicklung:<br>Lehrforschungsprojekt 1                                                                                        | 20 |
| PA M III ME<br>2 | Handlungskompetenz in<br>der Praxis fördern                 | 36 | H2b | Vertiefte<br>Hebammenkompetenz:<br>Angewandtes Lehren und<br>Lernen im Praxisumfeld von<br>Hebammen -<br>Anleitungsbegleitseminar             | 48 |
| PA M III ME<br>3 | Mit kultureller Vielfalt<br>professionell umgehen           | 24 | FG2 | Gesundheitssysteme und<br>Hebammentätigkeit national<br>und international, Kulturelle<br>und inter-kulturelle<br>Werthaltungen, Global Health | 22 |

### Prüfungen

| Module Praxisanleitung DKG                                                                                         | Module Masterstudiengang Tübingen                                                                                                                                                      |
|--------------------------------------------------------------------------------------------------------------------|----------------------------------------------------------------------------------------------------------------------------------------------------------------------------------------|
| Schriftliche Klausur (90 Minuten)<br>Schriftliche Hausarbeit (4 Seiten)<br>Mündliche Abschlussprüfung (30 Minuten) | Strukturierter Projektbericht (mind. 10 Seiten)<br>und Referat<br>Schriftliche Klausur (90 Minuten)<br>Lehrportfolio (10-15 Seiten)<br>Hausarbeit (10 Seiten)<br>Klausur (180 Minuten) |
