# Supplementary material for: Praxisanleitung: Qualifikation akademisieren
Source: Springer Nature journal article supplement (doi:10.1007/s43877-023-0846-6), 2024-01-01
Supplement: MOESM3 [file 26612490]

## Abbildung 2

### zum Beitrag „Praxisanleitung: Qualifikation akademisieren“

von Marie-Jeannine Riefert, Harald Abele, Joachim Graf

*HebammenWissen* (5) 1/2024, S. 24-27

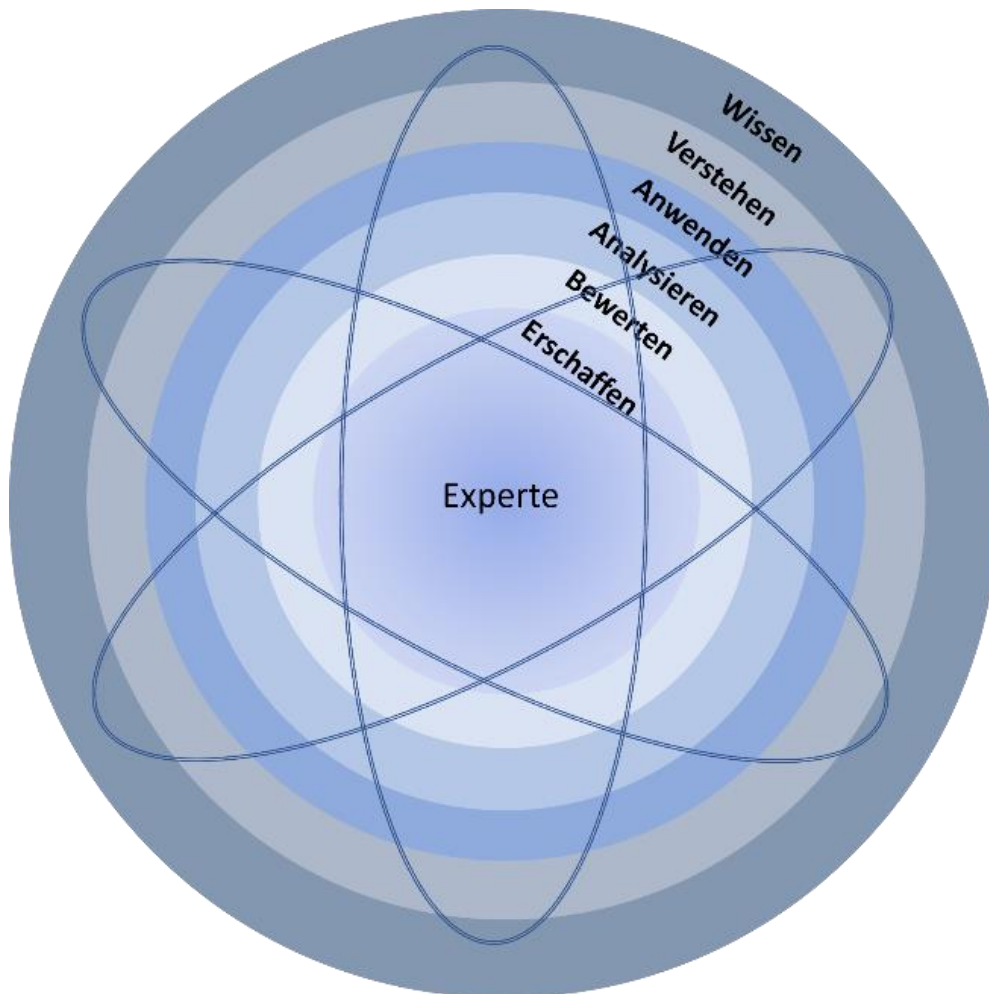

Abbildung 2: Lernzieltaxonomie in Anlehnung an die Lernzielmethode von Bloom

© M.-J. Riefert, H. Abele, J. Graf
